# Supplementary material
Source: MDPI journal article supplement (https://www.mdpi.com/2571-6255/6/10/402)
Supplement: s1 [file s1]

**Table S1.** Biophysical characteristics (mean ± SE) of fuel biomass in the fire experimental sites.

| Fuel characteristics                          | Climatic zones            |    |                           |    | Cropland categories       |    |                           |    |
|-----------------------------------------------|---------------------------|----|---------------------------|----|---------------------------|----|---------------------------|----|
|                                               | Sudanian                  | N  | Sudano-Sahelian           | N  | LC                        | N  | CC                        | N  |
|                                               | N = 45                    |    | N = 47                    |    | N = 43                    |    | N = 49                    |    |
| Carbon content in biomass fuel (%)            | 53.65 ± 0.23 <sup>a</sup> | 12 | 54.52 ± 0.27 <sup>b</sup> | 12 | 54.08 ± 0.32 <sup>a</sup> | 12 | 54.09 ± 0.27 <sup>a</sup> | 12 |
| Carbon content in ash fuel (%)                | 12.54 ± 0.36 <sup>a</sup> | 12 | 13.65 ± 0.35 <sup>a</sup> | 12 | 13.60 ± 0.35 <sup>a</sup> | 12 | 12.39 ± 0.38 <sup>a</sup> | 12 |
| Moisture content in biomass (%)               | 9.60 ± 0.41 <sup>a</sup>  | 12 | 8.89 ± 0.34 <sup>a</sup>  | 12 | 9.32 ± 0.5 <sup>a</sup>   | 12 | 9.16 ± 0.27 <sup>a</sup>  | 12 |
| Carbon loss (%)                               | 91.40 ± 0.23 <sup>a</sup> | 45 | 93.30 ± 0.21 <sup>b</sup> | 47 | 88.47 ± 0.07 <sup>a</sup> | 43 | 95.79 ± 0.06 <sup>b</sup> | 49 |
| Combustion Completeness (%)                   | 96.2 8± 0.00 <sup>a</sup> | 45 | 97.18 ± 0.00 <sup>b</sup> | 47 | 93.03 ± 0.0 <sup>a</sup>  | 43 | 100 ± 0.00 <sup>b</sup>   | 49 |
| Carbon remaining in postfire unburnt fuel (%) | 3.71 ± 0.21 <sup>a</sup>  | 45 | 2.81 ± 0.20 <sup>b</sup>  | 47 | 6.96 ± 0.05 <sup>a</sup>  | 43 | 0.0 ± 0.0 <sup>b</sup>    | 49 |
| Carbon remaining in postfire ash fuel (%)     | 4.88 ± 0.06 <sup>a</sup>  | 45 | 3.87 ± 0.02 <sup>b</sup>  | 47 | 4.55 ± 0.04 <sup>a</sup>  | 43 | 4.20 ± 0.06 <sup>b</sup>  | 49 |

Values with different letters indicate significant difference ( $p < 0.05$ , test of Wilcoxon) between climatic zone and cropland category;  $n$  = number of plots, SE = Standard Error.

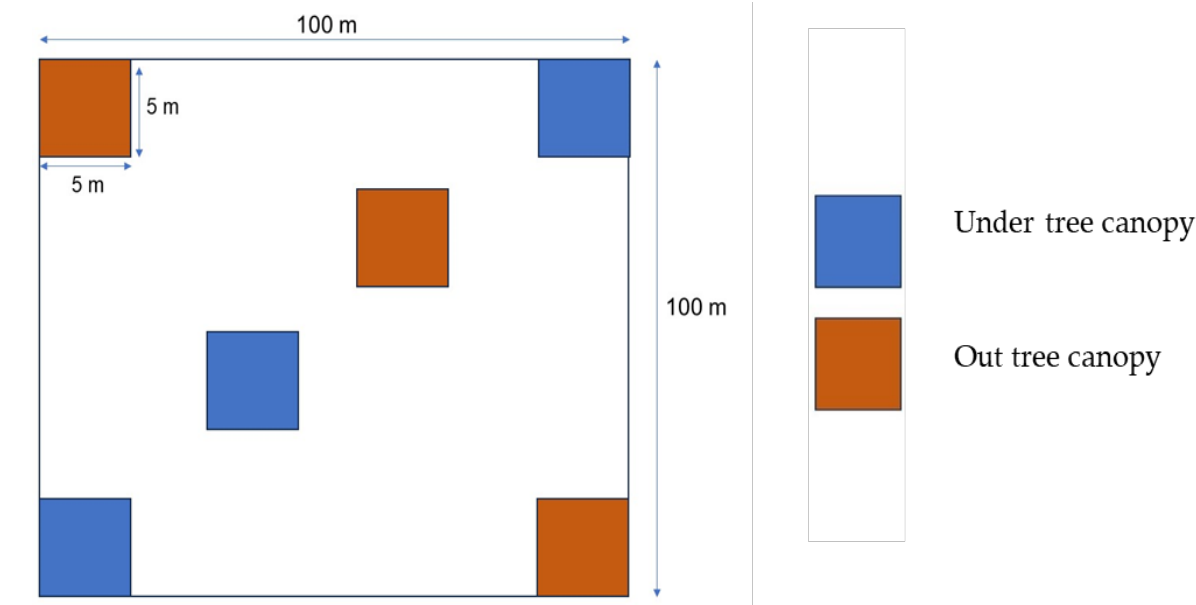

**Figure S1.** Experimental design showing subplots (5 m × 5 m) distribution within main plot (100 m × 100 m).
